# Supplementary material for: Clinical and Analytical Performance of ELISA Salivary Serologic Assay to Detect SARS-CoV-2 IgG in Children and Adults
Source: Preprints.org preprint supplement (doi:10.20944/preprints202311.1555.v1), 2023-11-24
Supplement: Supplementary file 1 [file supplementary]

**Supplementary Table 1:** Repeatability performances, estimated using 6 samples

| Sample number | Experimental set-up | Mean value (kAU/L) | Repeatability precision (%) |
| --- | --- | --- | --- |
| 1 | Five repetition, randomly pipetted in one plate | 1.61 | 5.5 |
| 2 | Five repetition, randomly pipetted in one plate | 3.77 | 3.9 |
| 3 | Five repetition, randomly pipetted in one plate | 5.96 | 5.99 |
| 4 | Five repetition, randomly pipetted in one plate | 7.42 | 23.6 |
| 5 | Five repetition, randomly pipetted in one plate | 10.1 | 15.90 |
| 6 | Twenty-five repetitions in different plates (5 each plate) | 2.01 | 20.9 |
